# Supplementary material
Source: Research Square preprint supplement (doi:10.21203/rs.3.rs-8619161/v1)
Supplement: Supplementary file 1 [file 6540ef0ba456005adf8e7733.pdf]

# Supporting Information for

## *The Fracture and Leap Cycle: Quantifying Narrative Surprise and Structural Resilience in Flash Fiction*

**Overview of the Supplementary Package.** This document and the associated files within the compressed package (**Supplementary\_Information.zip**) are provided to ensure the methodological transparency and reproducibility of the study. To comply with copyright and intellectual property restrictions while allowing for scientific verification, the materials are structured as follows:

**1. Contents of this PDF Document** The following supplementary items are included in the subsequent pages of this file:

- **Supplementary Figures S1 to S2**
- **Supplementary Table S1 to S10**

**2. Technical Replication Package (Standalone Files)** The following files are included to facilitate results replication and methodological review:

### Documentation

- **README.md:** A comprehensive technical guide providing environment specifications and step-by-step instructions.
- **environment.yaml / requirements.txt:** Configuration files for Python dependency management.

### Data Inventory

- **flash\_fiction\_with\_surprisal\_coherence\_semantic.csv:** The master dataset containing pre-computed numerical signals.
- **book\_list\_summary.csv:** (Metadata surrogate for the restricted raw corpus)

### Computational Pipeline

- **FlashFiction\_Analysis.ipynb:** A fully executable Jupyter Notebook used to reproduce all statistical analyses and figures reported in the paper.
- **check\_sent\_stats.py, calculate\_surprisal.py, coherence\_topic\_calc.py :** Python scripts used for preprocessing and signal extraction. (Detailed descriptions and functional specifications for each script are provided in **README.md**)

**3. Instructions for Researchers** For researchers wishing to replicate the findings, please refer to the **README.md** file for environment setup instructions. The statistical analysis can be immediately reproduced by running the **FlashFiction\_Analysis.ipynb** notebook, which is configured to utilise the provided numerical signals in the same directory.

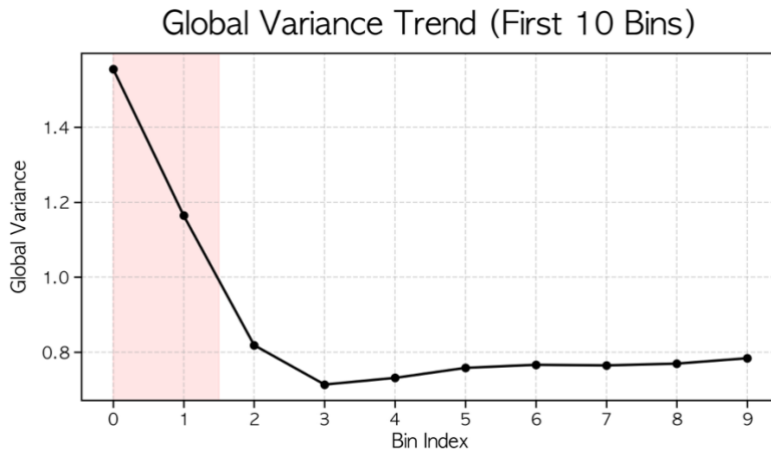

**Supplementary Fig. S1.** Variance stabilization at the narrative onset. The shaded region (Bins 0–1) represents the excluded warm-up period, with the analysis window commencing at Bin 2, where the signal enters a stable plateau.

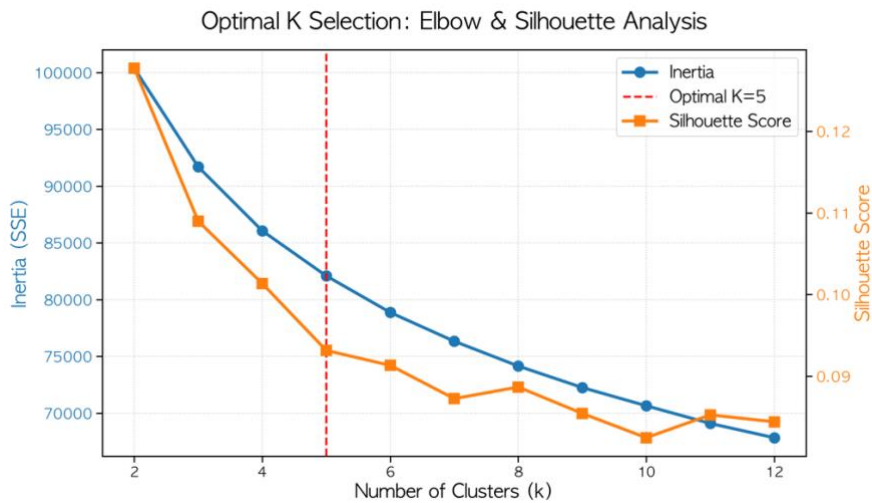

**Supplementary Fig. S2.** Validation of surprisal-based trajectory clustering. Identification of optimal cluster count (k) using Elbow (Inertia) and Silhouette analysis. The vertical dashed line at k=5 denotes the point of optimal structural stability.

**Supplementary Table S1. Metadata overview of the Korean flash fiction corpus.****(a) Metadata Schema Fields**

| <b>Column Name</b> | <b>Description</b>                                                            |
|--------------------|-------------------------------------------------------------------------------|
| <b>isbn</b>        | International Standard Book Number                                            |
| <b>story_title</b> | Title of the individual flash fiction story                                   |
| <b>text</b>        | Full narrative text of the story (Not provided due to copyright restrictions) |
| <b>author</b>      | Name of the author                                                            |
| <b>birth_year</b>  | Birth year of the author                                                      |
| <b>gender</b>      | Gender of the author                                                          |
| <b>book_title</b>  | Title of the source book or anthology                                         |
| <b>publisher</b>   | Name of the publisher                                                         |
| <b>pub_year</b>    | Year of publication                                                           |
| <b>country</b>     | Country of author                                                             |

**(b) Gender and Country Distribution**

| <b>Category</b> | <b>Sub-category</b> | <b>Count</b> | <b>Percentage (%)</b> |
|-----------------|---------------------|--------------|-----------------------|
| <b>Gender</b>   | Male                | 1,200        | 41.1                  |
|                 | Female              | 1,055        | 36.1                  |
|                 | Unknown             | 666          | 22.8                  |
| <b>Country</b>  | South Korea         | 2,666        | 91.3                  |
|                 | Japan               | 158          | 5.4                   |
|                 | USA                 | 68           | 2.3                   |
|                 | Others*             | 29           | 1.0                   |
|                 | <b>Total</b>        |              | <b>2,921</b>          |

*Note : Others include UK, France, Hungary, Russia, Canada, Spain, Ireland, and China.*

**(c) Gender and Origin Distribution**

| <b>Metric</b>                    | <b>Value</b> |
|----------------------------------|--------------|
| <b>Mean Year</b>                 | 2018.4       |
| <b>Median Year</b>               | 2020.0       |
| <b>Standard deviation</b>        | 4.9          |
| <b>Range (Min - Max)</b>         | 1998 – 2025  |
| <b>Interquartile Range (IQR)</b> | 2016 – 2022  |

**Supplementary Table S2. Hardware and software configuration of the high-performance computing (HPC) environment.**

| <b>Component</b>               | <b>Specification</b>           |
|--------------------------------|--------------------------------|
| <b>Operating system</b>        | Ubuntu 24.04.2 LTS             |
| <b>CPU</b>                     | Intel(R) Xeon(R) Silver 4516Y+ |
| <b>System memory (RAM)</b>     | 251 GiB                        |
| <b>GPU configuration</b>       | 2 × NVIDIA RTX A6000           |
| <b>GPU memory (per device)</b> | 48 GB VRAM                     |
| <b>Total GPU memory</b>        | 96 GB VRAM (2 × 48 GB)         |

*Note: These specifications represent the computational environment used for narrative signal extraction and all subsequent statistical analyses reported in this study.*

**Supplementary Table S3. Quantitative assessment of initialization noise and surprisal variance stabilization.**

| <b>Bin Index</b> | <b>Global Variance</b> | <b>Variance Drop (%)</b> |
|------------------|------------------------|--------------------------|
| <b>0</b>         | 1.5555                 | -                        |
| <b>1</b>         | 1.1644                 | 25.1%                    |
| <b>2</b>         | 0.8186                 | 29.7%                    |
| <b>3</b>         | 0.7137                 | 12.8%                    |
| <b>4–9</b>       | 0.71–0.78              | < 4.0% fluctuation       |

*Note : Summary of surprisal variance and step-wise reduction rates used to identify the stabilization threshold at the narrative onset. The significant drop in variance during the initial bins (0–1) reflects the dissipation of initialization noise, with stabilization (fluctuations < 4.0%) achieved from bin 4 onwards*

**Supplementary Table S4. Diagnostic tests for normality and homogeneity of variance across surprisal-trajectory shape descriptors.**

| Variable              | Shapiro-Wilk (min p) | Levene's test (p) | Assumptions Met |
|-----------------------|----------------------|-------------------|-----------------|
| <b>Peak Position</b>  | < .001               | < .001            | No              |
| <b>Peak Intensity</b> | < .001               | < .001            | No              |
| <b>Peak Count</b>     | < .001               | .358              | No              |
| <b>Volatility</b>     | < .001               | .651              | No              |

*Note: Normality was assessed for each cluster using the Shapiro-Wilk test; the minimum -value across all clusters is reported (min p). Homogeneity of variance was assessed using Levene's test across all five clusters. An alpha level of 0.05 was used for all diagnostic tests. Since all variables significantly violated the assumption of normality ( $p < .001$ ), non-parametric Kruskal-Wallis tests were employed for subsequent group-comparison analyses.*

**Supplementary Table S5. Pairwise post-hoc comparisons (Dunn's test) for surprisal-trajectory shape descriptors.**

| Comparison            | Archetype 0 | Archetype 1 | Archetype 2 | Archetype 3 | Archetype 4 |
|-----------------------|-------------|-------------|-------------|-------------|-------------|
| <i>Peak Position</i>  |             |             |             |             |             |
| <b>Archetype 0</b>    | -           | < .001      | < .001      | < .001      | < .001      |
| <b>Archetype 1</b>    | < .001      | -           | < .001      | < .001      | < .001      |
| <b>Archetype 2</b>    | < .001      | < .001      | -           | 0.160       | < .001      |
| <b>Archetype 3</b>    | < .001      | < .001      | 0.160       | -           | < .001      |
| <b>Archetype 4</b>    | < .001      | < .001      | < .001      | < .001      | -           |
| <i>Peak Intensity</i> |             |             |             |             |             |
| <b>Archetype 0</b>    | -           | < .001      | 1.000       | < .001      | 1.000       |
| <b>Archetype 1</b>    | < .001      | -           | < .001      | < .001      | < .001      |
| <b>Archetype 2</b>    | 1.000       | < .001      | -           | < .001      | 1.000       |
| <b>Archetype 3</b>    | < .001      | < .001      | < .001      | -           | < .001      |
| <b>Archetype 4</b>    | 1.000       | < .001      | 1.000       | < .001      | -           |
| <i>Peak Count</i>     |             |             |             |             |             |
| <b>Archetype 0</b>    | -           | < .001      | 1.000       | < .001      | 1.000       |
| <b>Archetype 1</b>    | < .001      | -           | < .001      | 0.232       | < .001      |
| <b>Archetype 2</b>    | 1.000       | < .001      | -           | < .001      | 1.000       |
| <b>Archetype 3</b>    | < .001      | 0.232       | < .001      | -           | < .001      |
| <b>Archetype 4</b>    | 1.000       | < .001      | 1.000       | < .001      | -           |

*Note: p-values are adjusted using the Bonferroni method. Volatility is omitted as the omnibus test was non-significant.*

**Supplementary Table S6. Summary of representative short stories for the identified narrative archetypes.**

| Archetype | Rank | Author          | Title [Translation]                                                | Summary (Narrative Focus)                                                                                  | Peak Sentence [Translation]                                                                                                                                             |
|-----------|------|-----------------|--------------------------------------------------------------------|------------------------------------------------------------------------------------------------------------|-------------------------------------------------------------------------------------------------------------------------------------------------------------------------|
| 0         | 1    | Shin Ju-hee     | Ko-ro-na-44 Geuk-bok-gi [Overcoming COVID-44]                      | A recovery journey from COVID-19 and psychological cleansing via cleaning a refrigerator.                  | Mundeuk, meomchugo sip-eotda. [Suddenly, I wanted to stop.]                                                                                                             |
|           | 2    | Kim Geun-pyeong | Chim-tu [Infiltration]                                             | The tension of physical advances and strict boundaries in a cinema setting.                                | Geunyang jomul-ttag-ida. [It is merely a slight fondling.]                                                                                                              |
|           | 3    | Park Si-ul      | Ut-eum Ju-sa [Laughter Injection]                                  | A woman experiences uncontrollable laughter during a funeral after a medical "laughter injection."         | Shin Daeri-cheoreom jjing-geurigo danineun hwasang-eun geumbang neul-eobeorindago. [A face that frowns like yours, Mr. Shin, will age quickly.]                         |
| 1         | 1    | Shin Kyung-sook | Ha-neun-im-ui Gu-du [God's Shoes]                                  | An epistolary reflection on Van Gogh's life and the inherent healing power of art.                         | H-ga nabodaneun neoege hwolssin doumi doel mal-eul hae jul su isseul geot gat-aseoyeotji. [I thought H... could give you much more helpful advice than I could.]        |
|           | 2    | Jeong Seon-yeop | Mo-mo-nim [Momonim]                                                | An aspiring writer faces hierarchy and naming politics within the literary establishment.                  | Eojjeon il-iya? Jugeun jul aratneunde? [What is the matter? I thought you were dead.]                                                                                   |
|           | 3    | Lee Ki-ho       | Eo-tteon Jol-eop-sik [A Certain Graduation]                        | A convenience store worker's attendance at a boy's graduation leads to class-based realization.            | Pyeon-uijeom-eun gakkap-guna, urideul-eun jaran-da. [The convenience store is close, and we grow up.]                                                                   |
| 2         | 1    | Jo Kyung-ran    | Geum-yo-il [Friday]                                                | A man's birthday dinner is derailed by the discovery of a hammer—his tool of community service—in his bag. | Junghakgyo gyosain ttal-eun... sangsehi gieokhago jijeokhaetda. [His daughter... pointed out in detail how much Song's lateness had worried and distressed the family.] |
|           | 2    | Lee Ki-ho       | Dal-ryeo-ra A-deul [Run, Son]                                      | A father's dreams for his son's soccer talent collide with the reality of urban competition.               | Geu-ui yeop jaseok-eneun... yeol sal meogeun adeul-i an-ja isseotda. [His ten-year-old son... was sitting in the seat next to him.]                                     |
|           | 3    | Kwak Seong-geun | Byeok-ryeon-hang Hwoe-jip [Raw Fish Restaurant at Byeokryeon Port] | A man planning an affair is surprised by his wife's proposal for a "gray divorce."                         | Corona ttaemune dadeul simgakhae. [Everyone is serious because of COVID.]                                                                                               |

|   |   |                 |                                                            |                                                                                                    |                                                                                                                                                                                      |
|---|---|-----------------|------------------------------------------------------------|----------------------------------------------------------------------------------------------------|--------------------------------------------------------------------------------------------------------------------------------------------------------------------------------------|
| 3 | 1 | Gu Ja-myong     | Neo-wa Na-ui Ye-jeong-doen Gae-ul [Our Predestined Autumn] | A woman presentation of a contract-termination document marks the end of a 30-year marriage.       | Kakisaek jeompeoga siljongja-ui silcheseongeul jeung-geohamyeo nama isseotda. [A khaki jumper with a faded collar remained, attesting to the reality of the missing person.]         |
|   | 2 | Jeong I-su      | Ri-mo-keon [Remote Control]                                | A wife's attempt to control her husband's alcoholism through diluted drinks and hidden medicine.   | Chwichim sigan-i ahop siseo du sigan-ina dwi-ro mulleonatda. [His bedtime moved back by two hours from nine o'clock.]                                                                |
|   | 3 | Lim Sang-tae    | Jjal-beun Dong-haeng [Short Accompaniment]                 | A widower reflects on his brief life with his late wife through the imagery of a mountain motel.   | Ae-cho-e yeohaeng-eun gwabun-han geos-iyetda. [The trip was unwarranted in the first place.]                                                                                         |
| 4 | 1 | Kim Geun-pyeong | Kkae-da-reum [Realization]                                 | A brief, celebratory account of South Korea's growth into a global cultural powerhouse.            | Naga-boseyo. [Go outside.]                                                                                                                                                           |
|   | 2 | Birdsmith       | Ro-seu-teu Bi-seu-teu [Lost Beast]                         | A surreal urban narrative exploring digital isolation and the absurdity of modern social cues.     | Chang bak haneul-e taeyang-i tteoolla bosong-bosong-han hayan gureum-e bul-eul noatda. [The sun rose in the window sky and set fire to the fluffy white clouds.]                     |
|   | 3 | Yoo Kyung-sook  | Jin-nun-kkae-bi-ro In-ha-yeo [Due to Sleet]                | A young girl's path to becoming a nun is changed by a sleet storm, shifting her religious journey. | Seunim-i geu dongne-ro siju-reul naomyeon Sukgyeong-ine sarangbangeseo harubam-eul muk-eo gatda. [Whenever the nun came to beg, she would stay overnight in Sukgyeong's guest room.] |

*Note : Due to copyright restrictions governing contemporary literary works, the full text of the short stories cannot be publicly shared. To ensure academic transparency and allow for verification of the thematic clusters, we provide concise English summaries of the prototypical narratives (ranked by proximity to the archetype centroid). These summaries highlight the core plot points and character motivations that served as the qualitative basis for our computational modeling, while fully adhering to intellectual property laws.*

**Supplementary Table S7. Point-wise diagnostic tests and omnibus group comparisons for discourse signals at surprisal peaks**

| Metric         | Category                 | Factor/Archetype           | Statistic         | P-value      |
|----------------|--------------------------|----------------------------|-------------------|--------------|
| Coherence      | Normality (Shapiro-Wilk) | Archetype 0                | W: 0.9917         | < 0.001      |
|                |                          | Archetype 1                | W: 0.9915         | < 0.001      |
|                |                          | Archetype 2                | W: 0.9945         | 0.014        |
|                |                          | Archetype 3                | W: 0.9930         | 0.002        |
|                |                          | Archetype 4                | W: 0.9943         | 0.002        |
|                | Homogeneity (Levene)     | All Clusters               | F: 2.0940         | 0.079        |
|                | <b>Omnibus (Kruskal)</b> | <b>Inter-cluster Diff.</b> | <b>H: 7.7885</b>  | <b>0.099</b> |
| Semantic Shift | Normality (Shapiro-Wilk) | Archetype 0                | W: 0.9967         | 0.161        |
|                |                          | Archetype 1                | W: 0.9893         | < 0.001      |
|                |                          | Archetype 2                | W: 0.9945         | 0.015        |
|                |                          | Archetype 3                | W: 0.9928         | 0.002        |
|                |                          | Archetype 4                | W: 0.9938         | 0.001        |
|                | Homogeneity (Levene)     | All Clusters               | F: 5.5143         | < 0.001      |
|                | <b>Omnibus (Kruskal)</b> | <b>Inter-cluster Diff.</b> | <b>H: 13.6708</b> | <b>0.008</b> |

**Supplementary Table S8. Post-hoc pairwise comparisons (Dunn's test) for point-wise signal deviations at surprisal peaks.**

|             | Archetype 0 | Archetype 1 | Archetype 2   | Archetype 3 | Archetype 4   |
|-------------|-------------|-------------|---------------|-------------|---------------|
| Archetype 0 | 1.000       | 0.329       | 1.000         | 0.538       | 0.066         |
| Archetype 1 | 0.329       | 1.000       | 0.241         | 1.000       | 1.000         |
| Archetype 2 | 1.000       | 0.241       | 1.000         | 0.400       | <b>0.044*</b> |
| Archetype 3 | 0.538       | 1.000       | 0.400         | 1.000       | 1.000         |
| Archetype 4 | 0.066       | 1.000       | <b>0.044*</b> | 1.000       | 1.000         |

*Note: Values represent Bonferroni-adjusted p-values.*

**Supplementary Table S9. Event-locked diagnostic tests and omnibus group comparisons for narrative recovery dynamics.**

| Metric               | Category                 | Factor/Archetype           | Statistic        | P-value     |
|----------------------|--------------------------|----------------------------|------------------|-------------|
| Coherence TTR        | Normality (Shapiro-Wilk) | Archetype 0                | W: .923          | < .001      |
|                      |                          | Archetype 1                | W: .928          | < .001      |
|                      |                          | Archetype 2                | W: .934          | < .001      |
|                      |                          | Archetype 3                | W: .909          | < .001      |
|                      |                          | Archetype 4                | W: .927          | < .001      |
|                      | Homogeneity (Levene)     | All Clusters               | F :0.830         | .506        |
|                      | <b>Omnibus (Kruskal)</b> | <b>Inter-cluster Diff.</b> | <b>H: 12.063</b> | <b>.017</b> |
| Coherence Slope      | Normality (Shapiro-Wilk) | Archetype 0                | W: .940          | < .001      |
|                      |                          | Archetype 1                | W: .919          | < .001      |
|                      |                          | Archetype 2                | W: .911          | < .001      |
|                      |                          | Archetype 3                | W: .931          | < .001      |
|                      |                          | Archetype 4                | W: .942          | < .001      |
|                      | Homogeneity (Levene)     | All Clusters               | F :1.801         | .126        |
|                      | <b>Omnibus (Kruskal)</b> | <b>Inter-cluster Diff.</b> | <b>H: 7.169</b>  | <b>.127</b> |
| Semantic Shift TTR   | Normality (Shapiro-Wilk) | Archetype 0                | W: .923          | < .001      |
|                      |                          | Archetype 1                | W: .943          | < .001      |
|                      |                          | Archetype 2                | W:.932           | < .001      |
|                      |                          | Archetype 3                | W: .932          | < .001      |
|                      |                          | Archetype 4                | W:.937           | < .001      |
|                      | Homogeneity (Levene)     | All Clusters               | F :0.838         | .501        |
|                      | <b>Omnibus (Kruskal)</b> | <b>Inter-cluster Diff.</b> | <b>H: 10.590</b> | <b>.032</b> |
| Semantic Shift Slope | Normality (Shapiro-Wilk) | Archetype 0                | W: .910          | < .001      |
|                      |                          | Archetype 1                | W:.924           | < .001      |
|                      |                          | Archetype 2                | W: .923          | < .001      |
|                      |                          | Archetype 3                | W: .939          | < .001      |
|                      |                          | Archetype 4                | W:.937           | < .001      |
|                      | Homogeneity (Levene)     | All Clusters               | F : 0.425        | .791        |
|                      | <b>Omnibus (Kruskal)</b> | <b>Inter-cluster Diff.</b> | <b>H: 13.077</b> | <b>.011</b> |

*Note: All p-values for the Shapiro-Wilk test were below the .001 threshold, indicating significant deviation from normality across all archetypes and metrics. Consequently, non-parametric Kruskal-Wallis tests were employed for inter-cluster comparisons.*

**Supplementary Table S10. Post-hoc pairwise comparisons (Dunn’s test) for event-locked narrative recovery metrics across archetypes.**

| Comparison                  | Archetype 0   | Archetype 1   | Archetype 2   | Archetype 3   | Archetype 4 |
|-----------------------------|---------------|---------------|---------------|---------------|-------------|
| <i>Coherence TTR</i>        |               |               |               |               |             |
| <b>Archetype 0</b>          | -             | 1.000         | 1.000         | 0.349         | 1.000       |
| <b>Archetype 1</b>          | 1.000         | -             | 1.000         | <b>0.016*</b> | 1.000       |
| <b>Archetype 2</b>          | 1.000         | 1.000         | -             | <b>0.045*</b> | 1.000       |
| <b>Archetype 3</b>          | 0.349         | <b>0.016*</b> | <b>0.045*</b> | -             | 0.392       |
| <b>Archetype 4</b>          | 1.000         | 1.000         | 1.000         | 0.392         | -           |
| <i>Semantic Shift TTR</i>   |               |               |               |               |             |
| <b>Archetype 0</b>          | -             | 0.091         | 0.371         | 1.000         | 1.000       |
| <b>Archetype 1</b>          | 0.091         | -             | 1.000         | 0.153         | 0.822       |
| <b>Archetype 2</b>          | 0.371         | 1.000         | -             | 0.567         | 1.000       |
| <b>Archetype 3</b>          | 1.000         | 0.153         | 0.567         | -             | 1.000       |
| <b>Archetype 4</b>          | 1.000         | 0.822         | 1.000         | 1.000         | -           |
| <i>Semantic Shift Slope</i> |               |               |               |               |             |
| <b>Archetype 0</b>          | -             | 1.000         | 1.000         | <b>0.040*</b> | 1.000       |
| <b>Archetype 1</b>          | 1.000         | -             | 1.000         | 0.331         | 1.000       |
| <b>Archetype 2</b>          | 1.000         | 1.000         | -             | <b>0.010*</b> | 0.836       |
| <b>Archetype 3</b>          | <b>0.040*</b> | 0.331         | <b>0.010*</b> | -             | 0.626       |
| <b>Archetype 4</b>          | 1.000         | 1.000         | 0.836         | 0.626         | -           |

*Note: Values represent Bonferroni-adjusted p-values. Cohrece Slope is omitted as the omnibus test was non-significant.*
